# Supplementary material for: Semi-Synthetic Dihydrotestosterone Derivatives Modulate Inherent Multidrug Resistance and Sensitize Colon Cancer Cells to Chemotherapy
Source: MDPI journal article supplement (doi:10.3390/pharmaceutics15020584), 2023-02-09
Supplement: s1 [file s1]

## Article

# Semi-Synthetic Dihydrotestosterone Derivatives Modulate Inherent Multidrug Resistance and Sensitize Colon Cancer Cells to Chemotherapy

Ferenc István Nagy <sup>1</sup>, Dóra Izabella Adamecz <sup>1</sup>, Ádám Baji <sup>2</sup>, Ágnes Kiricsi <sup>3</sup>, Ildikó Huliák <sup>1</sup>, Andrea Rónavári <sup>4</sup>, Zoltán Kónya <sup>4</sup>, Éva Frank <sup>2</sup>, Mohana Krishna Gopisetty <sup>1,5,\*</sup> and Mónika Kiricsi <sup>1,\*</sup>

<sup>1</sup> Department of Biochemistry and Molecular Biology, Doctoral School of Biology, University of Szeged, Közép Fásor 52, H-6726 Szeged, Hungary

<sup>2</sup> Department of Organic Chemistry, University of Szeged, Dóm tér 8, H-6720 Szeged, Hungary

<sup>3</sup> Department of Oto-Rhino-Laryngology, Head and Neck Surgery, University of Szeged, Tisza Lajos krt. 111, H-6720 Szeged, Hungary

<sup>4</sup> Department of Applied and Environmental Chemistry, University of Szeged, Rerrich tér 1, H-6720 Szeged, Hungary

<sup>5</sup> Molecular Genetics, German Cancer Research Center (DKFZ), Im Neuenheimer Feld 280, 69120 Heidelberg, Germany

\* Correspondence: mohanakrishna.gopisetty@dkfz-heidelberg.de (M.K.G.); kiricsim@bio.u-szeged.hu (M.K.); Tel.: +36-62-544887 (M.K.)

## Contents:

*Table S1: Data of IC<sub>50</sub> determination for chemotherapy drugs*

*Table S2: MTT combinational treatments*

*Table S3: Sequence and final concentrations of primers used in the study*

*Table S4: Data of RT-qPCR measurements of ABC transporter expression*

*Table S5: Data of densitometric analysis of ABCB1 expression*

*Table S6: Data of RT-qPCR measurements of endoplasmic reticulum stress*

*Table S7: Data of densitometric analysis of BIP*

*Table S8: Data of viability of Colo 320 and Colo 205 cells after steroid treatment*

Table S1: Data of IC<sub>50</sub> determination for chemotherapy drugs

| Bleomycin |              | Carmustine |             | Cisplatin |              | Doxorubicin |             | Epirubicin |             |
|-----------|--------------|------------|-------------|-----------|--------------|-------------|-------------|------------|-------------|
| C [μM]    | Mean ± SD    | C [μM]     | Mean ± SD   | C [μM]    | Mean ± SD    | C [μM]      | Mean ± SD   | C [μM]     | Mean ± SD   |
| Control   | 100.0 ± 6.1  | Control    | 100.0 ± 1.3 | Control   | 100.0 ± 12.9 | Control     | 100.0 ± 8.5 | Control    | 100.0 ± 0.2 |
| 4.14      | 99.3 ± 8.5   | 608        | 69.7 ± 7.9  | 1.62      | 64.9 ± 3.5   | 115         | 80.2 ± 0.6  | 14.37      | 74.1 ± 5.4  |
| 8.28      | 97.5 ± 16.2  | 1217       | 34.7 ± 3.5  | 3.24      | 65.1 ± 12.4  | 460         | 30.3 ± 6.6  | 28.75      | 82.2 ± 8.8  |
| 16.6      | 102.1 ± 11.6 | 2433       | 8.8 ± 1.5   | 6.49      | 61.6 ± 3.4   | 920         | 18.7 ± 6.4  | 57.50      | 52.8 ± 4.9  |
| 33.1      | 89.4 ± 15.5  | 4866       | 5.7 ± 0.6   | 13.0      | 62.1 ± 14.2  | 3680        | 11.6 ± 1.2  | 115.0      | 17.6 ± 2.9  |
| 132       | 61.1 ± 20.2  | 9733       | 5.5 ± 0.8   | 25.9      | 44.1 ± 7.1   |             |             | 230.0      | 13.7 ± 0.4  |
| 265       | 44.9 ± 18.0  | 19466      | 4.2 ± 0.3   | 51.9      | 22.8 ± 2.5   |             |             | 460.0      | 16.1 ± 0.4  |
| 530       | 32.8 ± 12.0  | 38932      | 4.1 ± 0.1   | 104       | 21.2 ± 2.0   |             |             | 920        | 15.9 ± 2.7  |

**Table S2: MTT combinational treatments.** Table representing the results of the viability screens on Colo 320 cells treated with various combinations of chemotherapeutic drugs (at the indicated concentrations) and androstano-arylpyrimidines. The effective combinations at the lowest drug concentrations are highlighted with green color. The viability of the cells receiving combinational treatments were compared to those subjected to the chemotherapy drug alone. Fisher's LSD test, \*:  $P < 0.05$ , \*\*:  $P < 0.01$ , \*\*\*:  $P < 0.001$ , \*\*\*\*:  $P < 0.0001$  ns: non-significant.

| Drugs       | Drug concentrations<br>$\mu\text{M}$ | Androstano-arylpyrimidines |      |      |      |      |
|-------------|--------------------------------------|----------------------------|------|------|------|------|
|             |                                      | 20 $\mu\text{M}$           |      |      |      |      |
|             |                                      | 10a                        | 10d  | 10e  | 10f  | 10g  |
| Bleomycin   | 45                                   | ns                         | ns   | ns   | ns   | **** |
|             | 68                                   | ns                         | ns   | ns   | ns   | **** |
|             | 98                                   | ns                         | ns   | ns   | ns   | **** |
|             | 143                                  | ns                         | ns   | ns   | ns   | **** |
|             | 215                                  | ns                         | ns   | ns   | **** | **** |
| Carmustine  | 491                                  | **                         | ***  | **   | ns   | ns   |
|             | 603                                  | *                          | **** | **** | **   | ns   |
|             | 729                                  | **                         | ns   | **   | ns   | ns   |
|             | 881                                  | ***                        | ns   | *    | **   | ns   |
|             | 1083                                 | **                         | ns   | ***  | *    | ns   |
| Cisplatin   | 2                                    | ns                         | ns   | ns   | ns   | ns   |
|             | 4                                    | ns                         | ns   | ns   | **   | *    |
|             | 8                                    | ns                         | ns   | ns   | ns   | **** |
|             | 16                                   | ns                         | ns   | ns   | ns   | ns   |
|             | 36                                   | ns                         | ns   | ns   | ns   | ns   |
| Doxorubicin | 112                                  | ns                         | ns   | ns   | ns   | ***  |
|             | 149                                  | ns                         | ns   | ns   | ns   | **   |
|             | 194                                  | ns                         | ns   | ns   | ns   | ns   |
|             | 252                                  | ns                         | **   | ns   | ns   | **   |
|             | 336                                  | ns                         | ns   | ns   | ns   | ns   |
| Epirubicin  | 19                                   | ****                       | **** | **** | **** | ns   |
|             | 27                                   | ****                       | **** | **** | **** | ns   |
|             | 37                                   | ns                         | ns   | ns   | *    | ns   |
|             | 50                                   | ns                         | ns   | ns   | *    | ns   |
|             | 69                                   | ns                         | ns   | ns   | ns   | ns   |

Table S3: Sequence and final concentrations of primers used in the study

| Gene          | Forward primer<br>Reverse primer                                            | Final concentration<br>[nM] |
|---------------|-----------------------------------------------------------------------------|-----------------------------|
| <i>GAPDH</i>  | 5'-TGCACCACCAACTGCTTAGC-3'<br>5'-GGCATGGACTGTGGTCATGAG-3'                   | 200                         |
| <i>ABCB1</i>  | 5'-GAGCCTACTTGGTGGCACAT-3'<br>5'-TCCTTCCAATGTGTTTCGGCA-3'                   | 200                         |
| <i>ABCC1</i>  | 5'-CATGCTCACTTTCTGGCTGGT-3'<br>5'-GTCCACCTGGGCATCCTCTTTT-3'                 | 400                         |
| <i>ABCC4</i>  | 5'-CGTGTCTTCTGGTGGCTCA-3'<br>5'-TCCCAGAACCCTTGCAACTC-3'                     | 200                         |
| <i>ABCC5</i>  | 5'-ATGCTCGGGAGCGTGGTTG-3'<br>5'-TTTCACATCAGAATTCCTGCGCC-3'                  | 400                         |
| <i>ABCC10</i> | 5'-CTCTCCTCACAGATGCCAAGAT-3'<br>5'-AGGATCGTGTGAGCCTATGG-3'                  | 400                         |
| <i>BIP</i>    | 5'-TGTTCAACCAATTATCAGCAAATC-3'<br>5'-TTCTGCTGTATCCTCTTCACCAGT-3'            | 200                         |
| <i>CHOP</i>   | 5'-GGAGCATCAGTCCCCCACTT-3'<br>5'-TGTGGGATTGAGGGTCACATC-3'                   | 200                         |
| <i>ATF4</i>   | 5'-GGCCACCATGGCGTATTA-3'<br>5'-TGCTGAATGCCGTGAGAA-3'                        | 200                         |
| <i>ATF6</i>   | 5'-CTTTTAGCCCGGACTCTTT-3'<br>5'-TCAGCAAAGAGAGCAGAATCC-3'                    | 200                         |
| <i>GRP94</i>  | 5'-CAGTTTTGGATCTTGCTGT-3'<br>5'-CAGCTGTAGATTCTTTGC-3'                       | 200                         |
| <i>XBP1s</i>  | 5'-AACCAGGAGTTAAGACAGCGCTT-3'<br>5'-CTGCACCCTCTGCGGACT-3'                   | 200                         |
| <i>XBP1t</i>  | 5'-CTGAATCTGAAGAGTCAATACCGCCAGAAT-3'<br>5'-AGGAGTTAAGACAGCGCTTGGGGATGGAT-3' | 200                         |
| <i>NF-KB</i>  | 5'-AGCACAGATACCACCAAGACCC-3'<br>5'-CCAGGGAGATGCGCACTG-3'                    | 200                         |

Table S4: Data of RT-qPCR measurements of ABC transporter expression

| Mean $\pm$ SD | ABCB1           | ABCC1           | ABCC4           | ABCC5           | ABCC10          |
|---------------|-----------------|-----------------|-----------------|-----------------|-----------------|
| 10a           | 2.72 $\pm$ 0.01 | 1.31 $\pm$ 0.17 | 1.41 $\pm$ 0.22 | 2.43 $\pm$ 0.12 | 1.87 $\pm$ 0.21 |
| 10d           | 1.12 $\pm$ 0.01 | 0.92 $\pm$ 0.05 | 1.27 $\pm$ 0.17 | 1.36 $\pm$ 0.12 | 1.24 $\pm$ 0.02 |
| 10e           | 0.62 $\pm$ 0.01 | 1.08 $\pm$ 0.15 | 0.94 $\pm$ 0.10 | 0.93 $\pm$ 0.15 | 0.77 $\pm$ 0.09 |
| 10f           | 1.52 $\pm$ 0.03 | 1.35 $\pm$ 0.11 | 1.08 $\pm$ 0.11 | 1.65 $\pm$ 0.15 | 1.22 $\pm$ 0.07 |
| 10g           | 1.43 $\pm$ 0.08 | 2.00 $\pm$ 0.23 | 1.41 $\pm$ 0.20 | 1.93 $\pm$ 0.13 | 1.32 $\pm$ 0.05 |

Table S5: Data of densitometric analysis of ABCB1 expression

|               | Control           | Tunicamycin        | 10a               | 10d                | 10e               | 10f                | 10g               |
|---------------|-------------------|--------------------|-------------------|--------------------|-------------------|--------------------|-------------------|
| Mean $\pm$ SD | 93182 $\pm$ 16560 | 132439 $\pm$ 37564 | 117779 $\pm$ 2819 | 116783 $\pm$ 14870 | 83740 $\pm$ 14555 | 117388 $\pm$ 20348 | 117034 $\pm$ 3961 |

Table S6: Data of RT-qPCR measurements of endoplasmic reticulum stress

| Mean $\pm$ SD | ATF4            | ATF6            | BIP             | CHOP             | EDEM            | GRP94           | NFKB            | XBP1t           | XBP1s           |
|---------------|-----------------|-----------------|-----------------|------------------|-----------------|-----------------|-----------------|-----------------|-----------------|
| Control       | 1.00 $\pm$ 0.04 | 1.00 $\pm$ 0.05 | 1.00 $\pm$ 0.02 | 1.00 $\pm$ 0.05  | 1.00 $\pm$ 0.06 | 1.00 $\pm$ 0.01 | 1.00 $\pm$ 0.00 | 1.00 $\pm$ 0.08 | 1.00 $\pm$ 0.07 |
| Tunicamycin   | 2.30 $\pm$ 0.04 | 1.19 $\pm$ 0.09 | 2.69 $\pm$ 0.10 | 4.81 $\pm$ 0.39  | 1.70 $\pm$ 0.19 | 5.35 $\pm$ 0.37 | 1.47 $\pm$ 0.04 | 2.63 $\pm$ 0.08 | 0.78 $\pm$ 0.25 |
| 10a           | 2.15 $\pm$ 0.20 | 2.15 $\pm$ 0.19 | 6.18 $\pm$ 0.17 | 14.33 $\pm$ 1.01 | 1.76 $\pm$ 0.29 | 7.03 $\pm$ 0.4  | 1.35 $\pm$ 0.03 | 4.71 $\pm$ 0.31 | 6.54 $\pm$ 2.15 |
| 10d           | 1.46 $\pm$ 0.12 | 1.33 $\pm$ 0.18 | 2.27 $\pm$ 0.13 | 2.02 $\pm$ 0.09  | 1.70 $\pm$ 0.16 | 1.26 $\pm$ 0.34 | 1.48 $\pm$ 0.01 | 1.73 $\pm$ 0.10 | 2.33 $\pm$ 0.43 |
| 10e           | 4.18 $\pm$ 0.06 | 2.40 $\pm$ 0.06 | 2.20 $\pm$ 0.21 | 6.97 $\pm$ 0.61  | 3.42 $\pm$ 0.07 | 1.81 $\pm$ 0.14 | 2.51 $\pm$ 0.02 | 2.82 $\pm$ 0.1  | 4.85 $\pm$ 0.28 |
| 10f           | 1.88 $\pm$ 0.16 | 1.72 $\pm$ 0.08 | 2.49 $\pm$ 0.25 | 4.60 $\pm$ 0.19  | 1.68 $\pm$ 0.05 | 3.05 $\pm$ 0.17 | 1.72 $\pm$ 0.07 | 2.73 $\pm$ 0.07 | 3.39 $\pm$ 0.33 |
| 10g           | 1.53 $\pm$ 0.17 | 1.27 $\pm$ 0.10 | 1.87 $\pm$ 0.02 | 1.05 $\pm$ 0.10  | 1.64 $\pm$ 0.10 | 0.65 $\pm$ 0.05 | 1.61 $\pm$ 0.10 | 1.20 $\pm$ 0.03 | 1.67 $\pm$ 0.25 |

Table S7: Data of densitometric analysis of Bip

|               | Control       | Tunicamycin    | 10a            | 10d           | 10e            | 10f            | 10g            |
|---------------|---------------|----------------|----------------|---------------|----------------|----------------|----------------|
| Mean $\pm$ SD | 270 $\pm$ 6.4 | 448 $\pm$ 24.7 | 472 $\pm$ 7.78 | 596 $\pm$ 107 | 589 $\pm$ 24.0 | 442 $\pm$ 64.3 | 413 $\pm$ 21.2 |

Table S8: Data of viability of Colo 320 and Colo 205 cells after steroid treatment

|          | Control           | 10a              | 10d              | 10e              | 10f              | 10g              |
|----------|-------------------|------------------|------------------|------------------|------------------|------------------|
| Colo 320 | 100.0 $\pm$ 10.29 | 86.25 $\pm$ 5.74 | 85.64 $\pm$ 9.25 | 86.12 $\pm$ 3.74 | 86.78 $\pm$ 3.74 | 74.73 $\pm$ 3.43 |
| Colo 205 | 100.0 $\pm$ 2.0   | 98.6 $\pm$ 2.5   | 99.5 $\pm$ 3.20  | 101.0 $\pm$ 4.3  | 94 $\pm$ 1.3     | 82.0 $\pm$ 3.1   |
